# Supplementary material for: Systematic analysis of lysine 2-hydroxyisobutyrylation posttranslational modification in wheat leaves
Source: PLOS journal article supplement (doi:10.1371/journal.pone.0253325), 2021-06-17

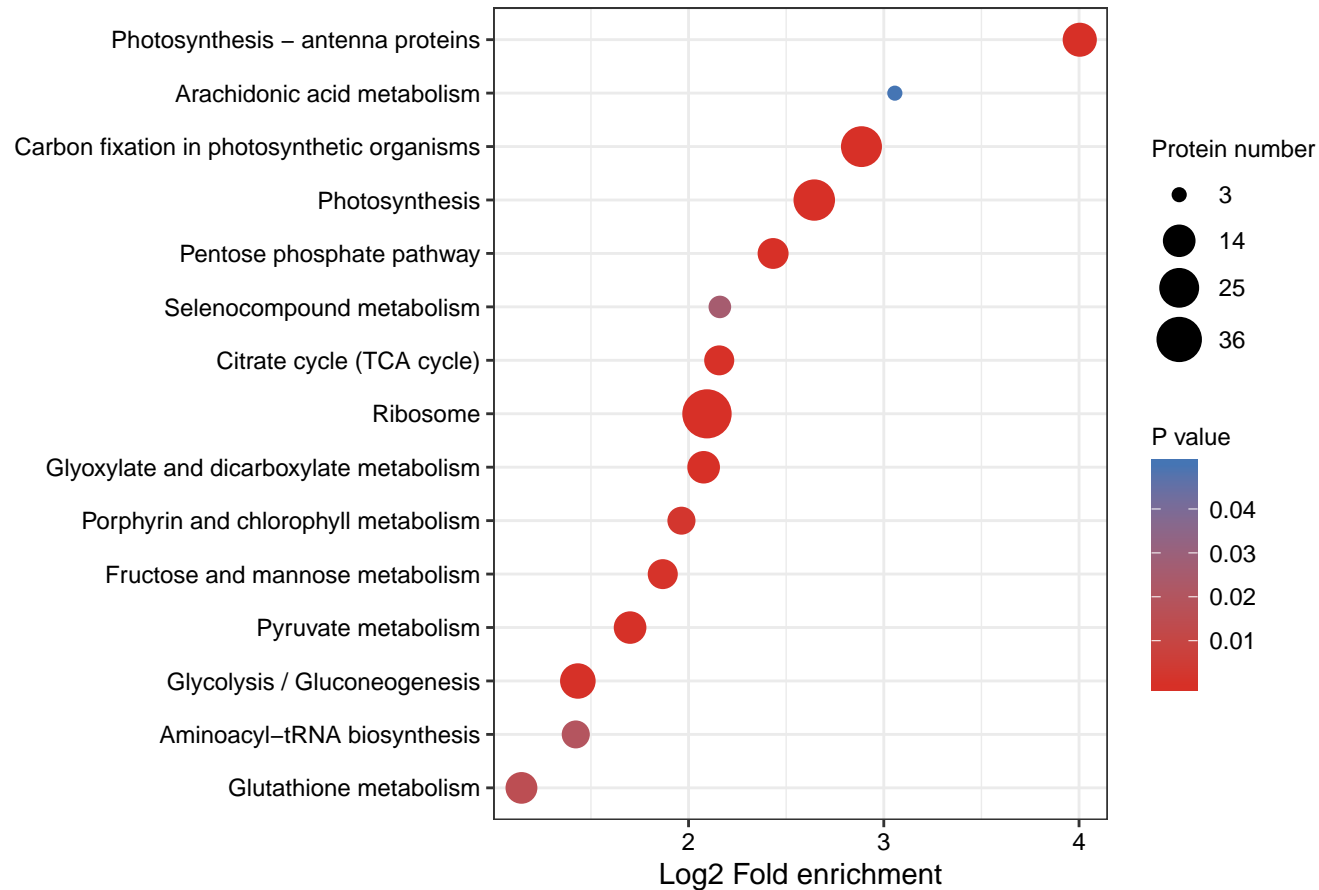

Supplement: S1 (10.1371/journal.pone.0253325.s001) [file journal.pone.0253325.s001]
